# Supplementary material
Source: PubMed Central journal article supplement (PMC7093129)
Supplement: IAI.00041-20-s0001.pdf [file IAI.00041-20-s0001.pdf]

## Supplementary Figure

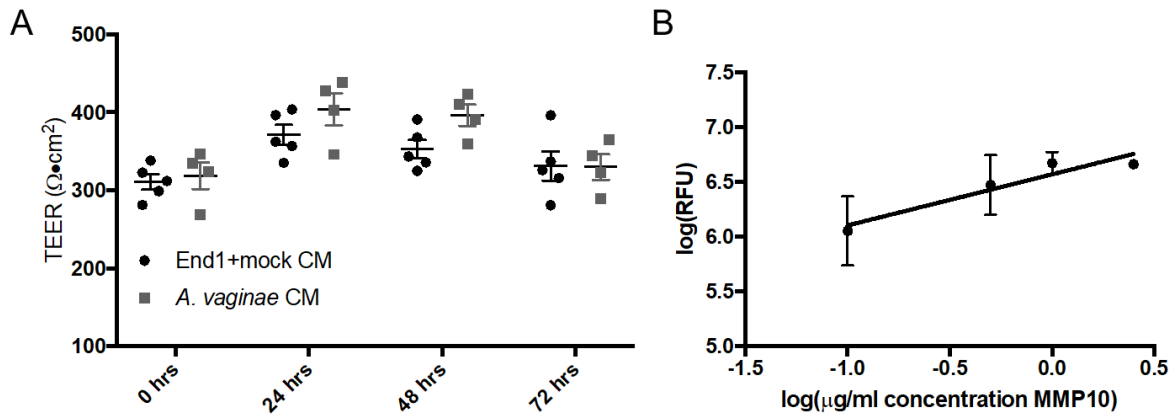

(A) *A. vaginae* CM does not disrupt endocervical epithelium. Polarized A2EN were treated with either End1+mock CM or *A. vaginae* CM at 4X concentration for 72 hours, with retreatment and TEER measurement every 24 hours. 4 different preparations of CM were used. (B) **MMP10 standard curve.** MMP10 was used as a reference for MMP activity measured by the Generic MMP activity fluorometric assay used in Figure 4.  $n = 3$  for each point, except 6.25  $\mu\text{g/ml}$ , which was measured only once.
